# Supplementary material
Source: PubMed Central journal article supplement (PMC3889774)
Supplement: JCM.01467-13_zjm999092859so1.pdf [file JCM.01467-13_zjm999092859so1.pdf]

| <b>Study</b>                | <b>Country</b> | <b>Patients number</b> | <b>Mean age (y)</b> | <b>Study design, enrollment</b> | <b>Sample part</b> | <b>Ref Standard</b> |
|-----------------------------|----------------|------------------------|---------------------|---------------------------------|--------------------|---------------------|
| Klatte et al, 2013          | Germany        | 52                     | 65                  | Retrospective, NA               | Hip                | M                   |
| Fink et al, 2013            | Germany        | 100                    | 68                  | Prospective, NA                 | hip                | H,M                 |
| Battaglia et al, 2011       | Italy          | 30                     | 66                  | Prospective, NA                 | Hip                | M                   |
| Tohtz et al, 2010           | Germany        | 64                     | 66.7                | Prospective, Consecutive        | Hip                | IOF, H              |
| Meermans et al, 2010        | United Kingdom | 120                    | NA                  | Prospective, NA                 | Hip or knee        | M                   |
| Muller et al, 2008          | Germany        | 50                     | 69                  | Prospective, NA                 | Hip                | IOF, M, R           |
| Fink et al, 2008            | Germany        | 145                    | 68.4                | Prospective, NA                 | knee               | H, M                |
| Trampuz et al, 2007         | United States  | 160                    | 69                  | Prospective, NA                 | Hip or knee        | IOF, H              |
| Van den Bekerom et al, 2006 | Belgium        | 68                     | 67                  | Retrospective, NA               | Knee               | IOF, M              |
| Trampuz et al, 2006         | United States  | 64                     | 71                  | Prospective, NA                 | Hip or knee        | IOF, H              |
| Ali et al, 2006             | United Kingdom | 73                     | NA                  | NA, NA                          | Hip                | IOF, M              |
| Panousis et al, 2005        | United Kingdom | 91                     | 66                  | Prospective, Consecutive        | Hip or knee        | IOF, M              |
| Williams et al, 2004        | United Kingdom | 273                    | NA                  | NA, Consecutive                 | Hip                | M                   |
| Malhotra et al, 2004        | Australia      | 38                     | 70                  | Retrospective, NA               | Hip                | H                   |
| Bernard et al, 2004         | Switzerland    | 127                    | 69                  | Retrospective, NA               | Hip or knee        | M                   |
| Somme et al, 2003           | France         | 100                    | 67                  | Retrospective, NA               | Hip                | IOF, M              |
| Virolainen et al, 2002      | Finland        | 58                     | 72.8                | Retrospective, NA               | Hip or knee        | IOF, M, R           |

|                        |                |     |      |                            |             |           |
|------------------------|----------------|-----|------|----------------------------|-------------|-----------|
| Itasaka et al, 2001    | Japan          | 29  | 67.5 | Retrospective, NA          | Hip         | H, M      |
| Eisler et al, 2001     | Norway         | 57  | 74   | Retrospective, onsecutive  | Hip         | M         |
| Teller et al, 2000     | United States  | 137 | 61   | Retrospective, NA          | Hip or knee | M         |
| Spangehl et al, 1999   | Canada         | 180 | 65   | Prospective, NA            | Hip         | IOF, H, M |
| Pons et al, 1999       | Spain          | 79  | 65   | Prospective, NA            | Hip         | H, M      |
| Barrack et al,1997     | United States  | 77  | 65   | NA, NA                     | Knee        | M         |
| Mulcahy et al, 1996    | Ireland        | 71  | 68.7 | NA, Consecutive            | Hip         | IOF, M    |
| Lachiewicz et al, 1996 | United States  | 156 | 59   | Retrospective, Consecutive | Hip         | IOF, M    |
| Fehring et al, 1996    | United States  | 166 | NA   | Retrospective, Consecutive | Hip         | IOF       |
| Duff et al, 1996       | United States  | 42  | 63   | Retrospective, NA          | Knee        | IOF       |
| Taylor et al, 1995     | United Kingdom | 86  | 70   | Retrospective, Consecutive | Hip         | IOF, M    |
| Tigges et al, 1993     | United States  | 147 | NA   | Prospective, NA            | Hip         | M         |
| Kraemer et al, 1993    | Canada         | 45  | 60   | Retrospective, NA          | Hip         | M         |
| Glithero et al, 1993   | United Kingdom | 54  | NA   | NA, Consecutive            | Hip or knee | M         |
| Barrack et al, 1993    | United States  | 260 | NA   | Retrospective, Consecutive | Hip         | IOF, M    |
| Roberts et al, 1992    | United Kingdom | 78  | NA   | NA, Consecutive            | Hip         | M         |
| Levitsky et al, 1991   | United States  | 55  | 66.4 | Prospective, NA            | Hip or knee | IOF, M    |

H: histological examination; IOF: Intraoperative finding; M: microbiological or laboratory examination; NA, not available

**TABLE 1** Characteristics of the 34 reports in our meta-analysis of the diagnosis of PJI using preoperative aspiration culture
